# Supplementary material for: Cultivated Tomato (Solanum lycopersicum L.) Suffered a Severe Cytoplasmic Bottleneck during Domestication: Implications from Chloroplast Genomes
Source: PubMed Central journal article supplement (PMC7692331; doi:10.3390/plants9111443), 2020-10-26
Supplement: plants-09-01443-s001.pdf [file plants-09-01443-s001.pdf]

## *Supplementary materials*

# **Cultivated tomato (*Solanum lycopersicum* L.) suffered a severe cytoplasmic bottleneck during domestication: implications from chloroplast genomes**

**Rachele Tamburino<sup>1§</sup>, Lorenza Sannino<sup>1§</sup>, Donata Cafasso<sup>2</sup>, Concita Cantarella<sup>3</sup>, Luigi Orrù<sup>4</sup>, Teodoro Cardi<sup>3</sup>, Salvatore Cozzolino<sup>2</sup>, Nunzio D'Agostino<sup>3,5</sup> and Nunzia Scotti<sup>1\*</sup>**

<sup>1</sup> CNR-IBBR, National Research Council of Italy, Institute of Biosciences and BioResources, Via Università 133, 80055 Portici (NA), Italy; [rachele.tamburino@ibbr.cnr.it](mailto:rachele.tamburino@ibbr.cnr.it); [lorenza.sannino@ibbr.cnr.it](mailto:lorenza.sannino@ibbr.cnr.it); [nunzia.scotti@ibbr.cnr.it](mailto:nunzia.scotti@ibbr.cnr.it)

<sup>2</sup> Department of Biology, University of Naples Federico II, Via Cinthia, 80126 Naples, Italy; [cafasso@unina.it](mailto:cafasso@unina.it); [cozzolin@unina.it](mailto:cozzolin@unina.it)

<sup>3</sup> CREA Research Centre for Vegetable and Ornamental Crops, Via dei Cavalleggeri 25, 84098 Pontecagnano Faiano (SA), Italy; [concita.cantarella@gmail.com](mailto:concita.cantarella@gmail.com); [teodoro.cardi@crea.gov.it](mailto:teodoro.cardi@crea.gov.it)

<sup>4</sup> CREA Research Centre for Genomics and Bioinformatics, via S. Protaso 302, 29017 Fiorenzuola d'Arda (PC), Italy; [luigi.orrù@crea.gov.it](mailto:luigi.orrù@crea.gov.it)

<sup>5</sup> Department of Agricultural Sciences, University of Naples Federico II, Via Università 133, 80055 Portici (NA), Italy; [nunzio.dagostino@unina.it](mailto:nunzio.dagostino@unina.it)

§ These authors contributed equally;

\* Correspondence: [nscotti@unina.it](mailto:nscotti@unina.it), [nunzia.scotti@ibbr.cnr.it](mailto:nunzia.scotti@ibbr.cnr.it); Tel.: +39-081 2539482

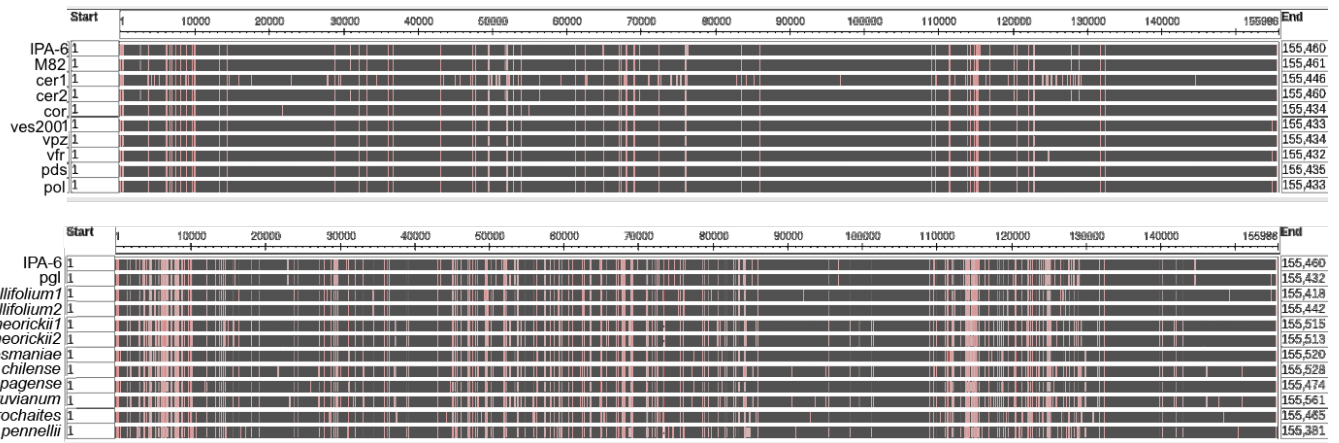

**Figure S1.** Overview of the nucleotide variability in nine plastomes sequenced in this study and in eleven species available in GenBank. The accession number AM087200 (cv. IPA-6) was used as reference. Red lines represent variable regions.

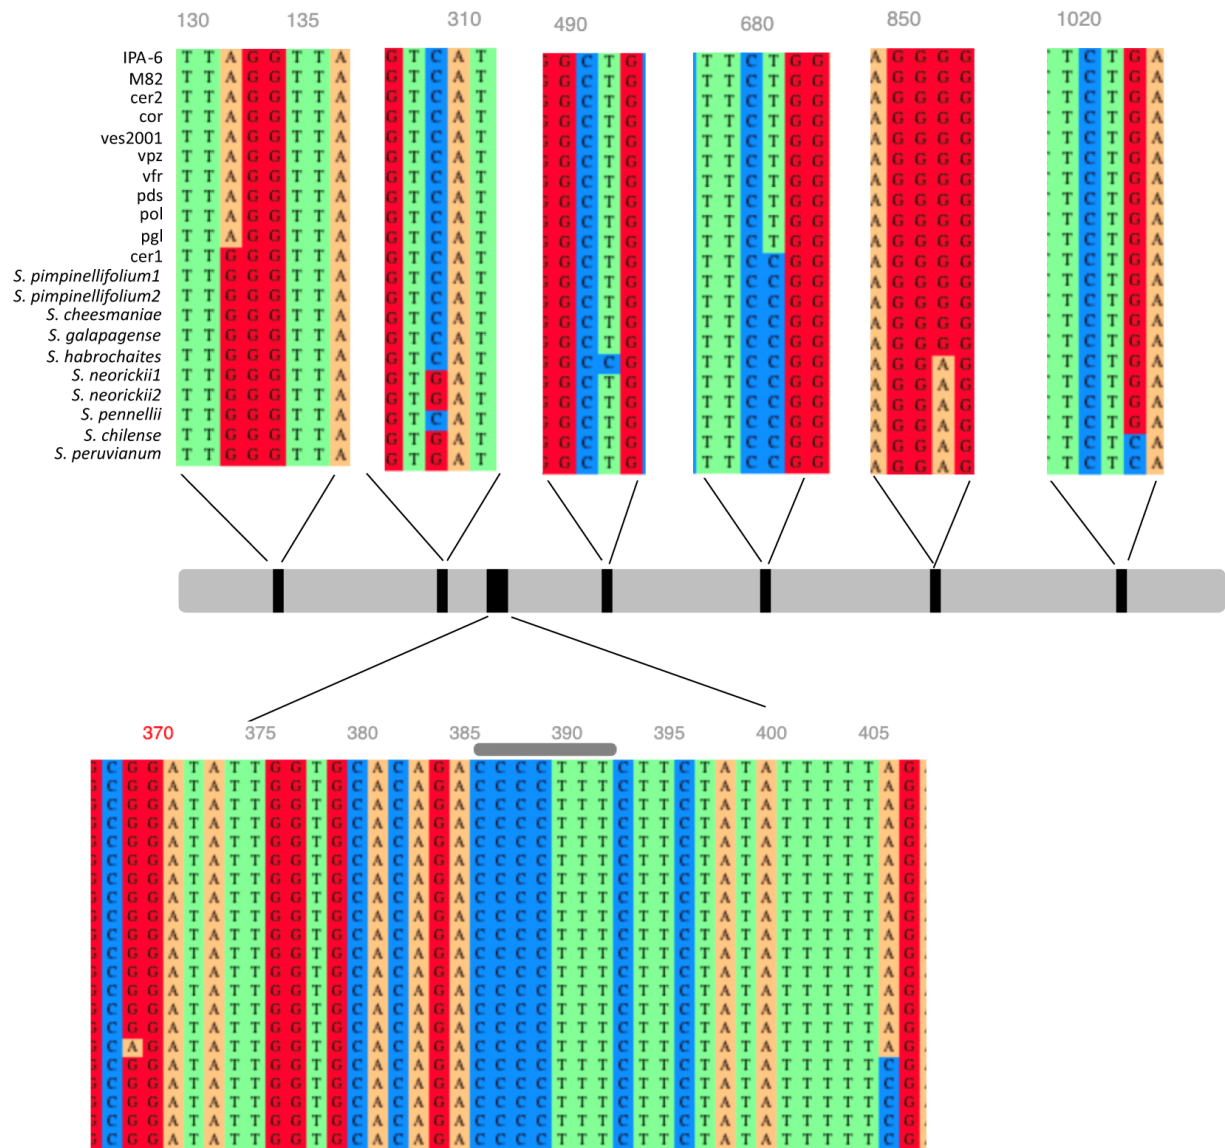

**Figure S2.** Schematic representation of the nucleotide variability observed in the *ndhH* gene for the plastomes under investigation. Grey bar represents the nucleotide multiple-sequence alignment (MSA) and it is scaled according to the MSA length. Black boxes indicate variable regions in the MSA. Above and below each box, a snapshot of the MSA along with alignment positions is reported.

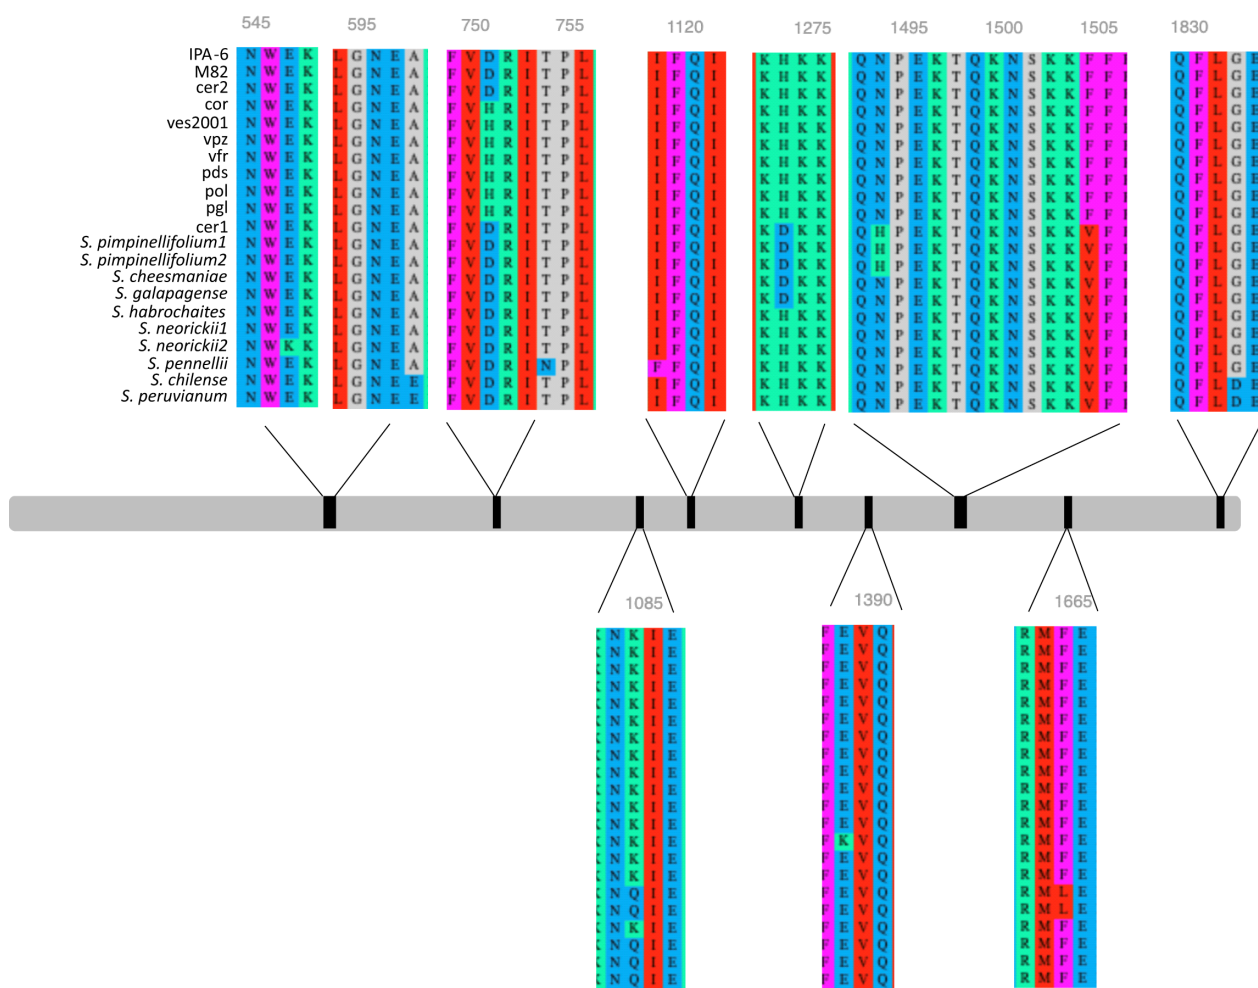

**Figure S3.** Schematic representation of the amino acid variability observed in the Ycf1 protein for the plastomes under investigation. Grey bar represents the amino acid multiple-sequence alignment (MSA) and it is scaled according to the MSA length. Black boxes indicate variable regions in the MSA. Above and below each box, a snapshot of the MSA along with alignment positions is reported.

a

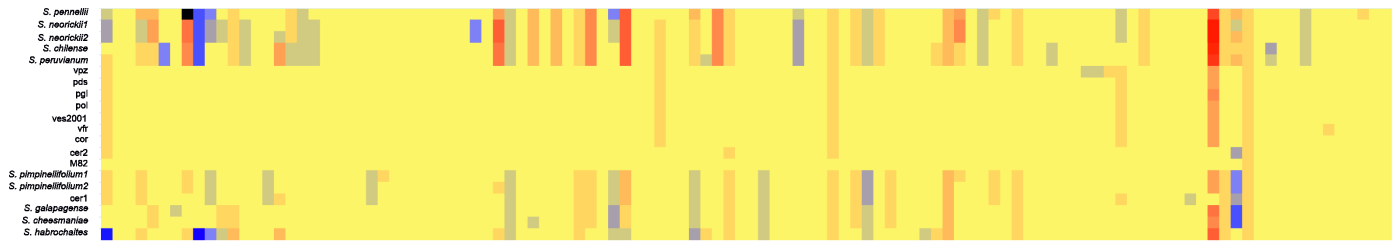

b

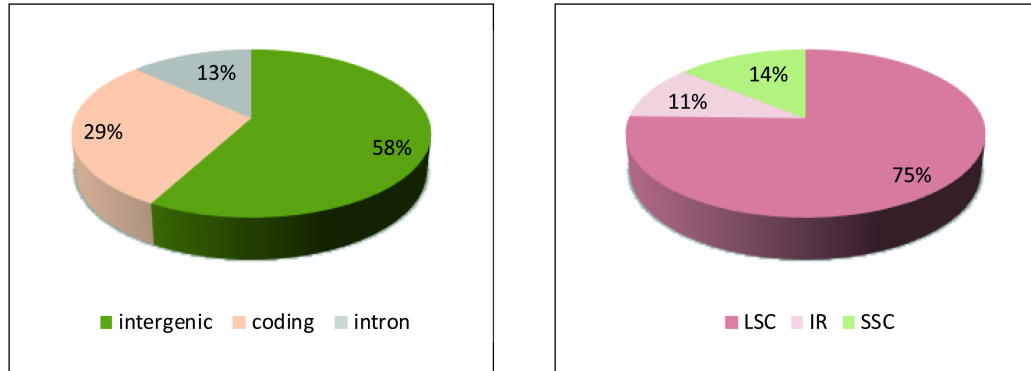

**Figure S4.** Simple sequence repeats (SSRs) in nine plastomes sequenced in this study and in eleven species available in GenBank. The plastome of IPA-6 (AM087200) was used as reference a) Heatmap representing differences in SSR size; colours range from red (SSR size larger than the reference) through yellow to blue (SSR size smaller than the reference). Black is for missing SSRs. b) Pie chart describing the percentage of SSRs located in coding sequences of genes, introns and intergenic regions as well as in the large single copy (LSC), small single copy (SSC) and inverted repeat b (IR) regions.

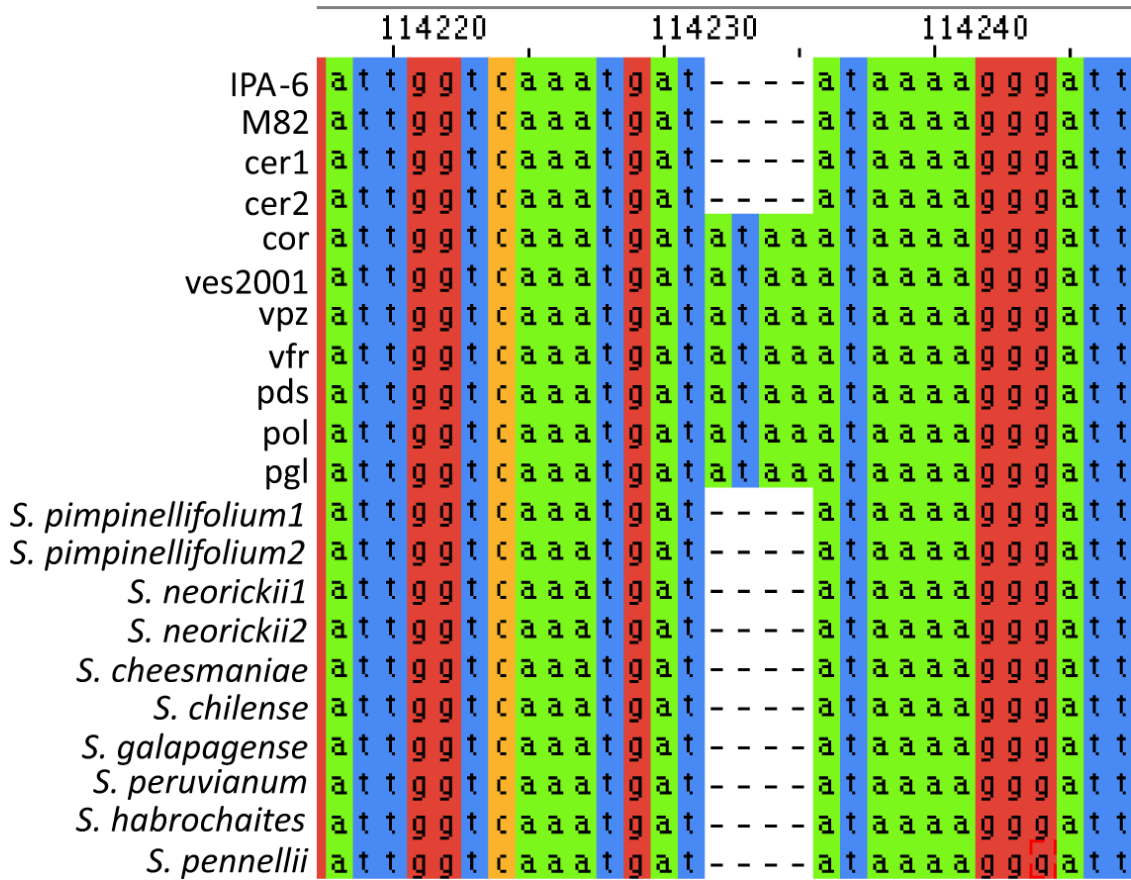

**Figure S5.** Multiple-sequence alignment (MSA) of the region harbouring the duplicated sequence (ATAA)<sub>2</sub> scored only in local landraces.

Corbarino (average read depth/nucleotide: 1072.84)

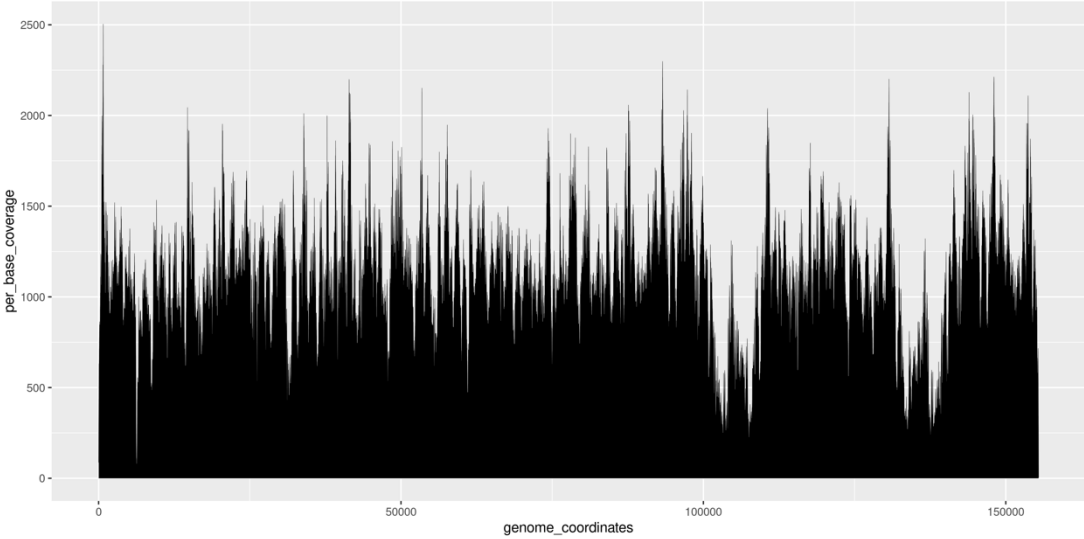

PDS (average read depth/nucleotide: 668.65)

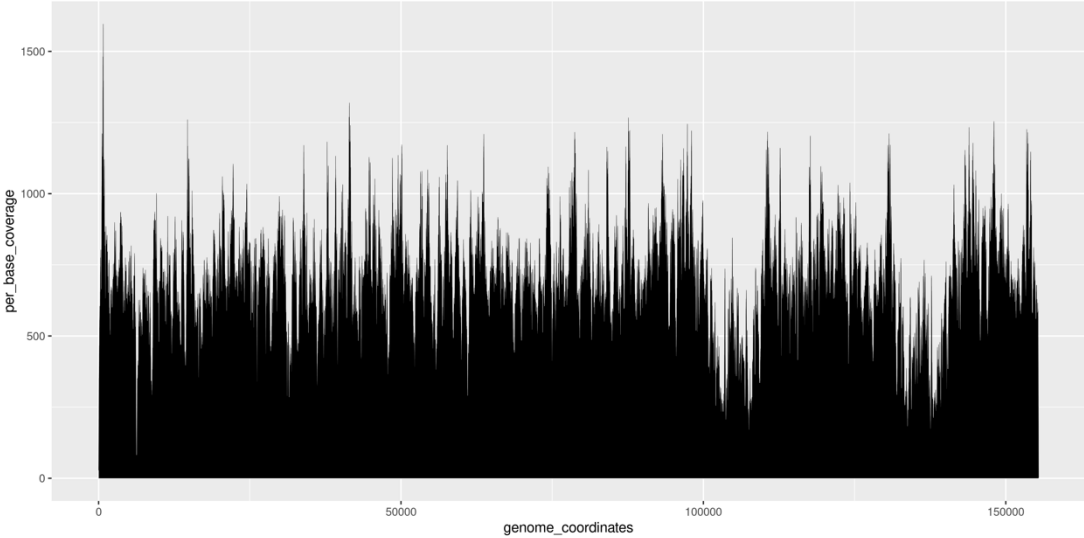

Piennolo giallo (average read depth/nucleotide: 476.94)

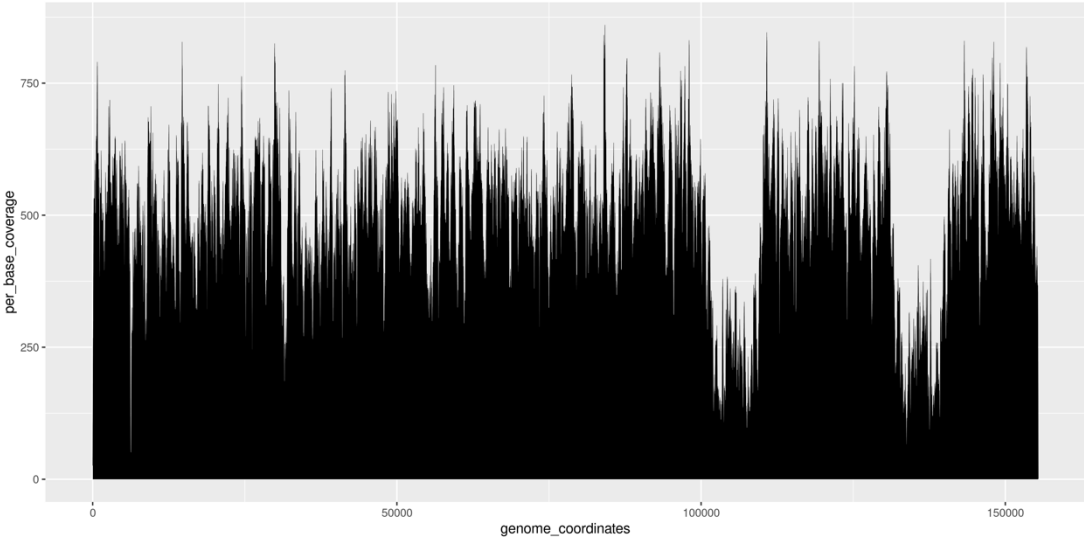

Pollena (average read depth/nucleotide: 1649.77)

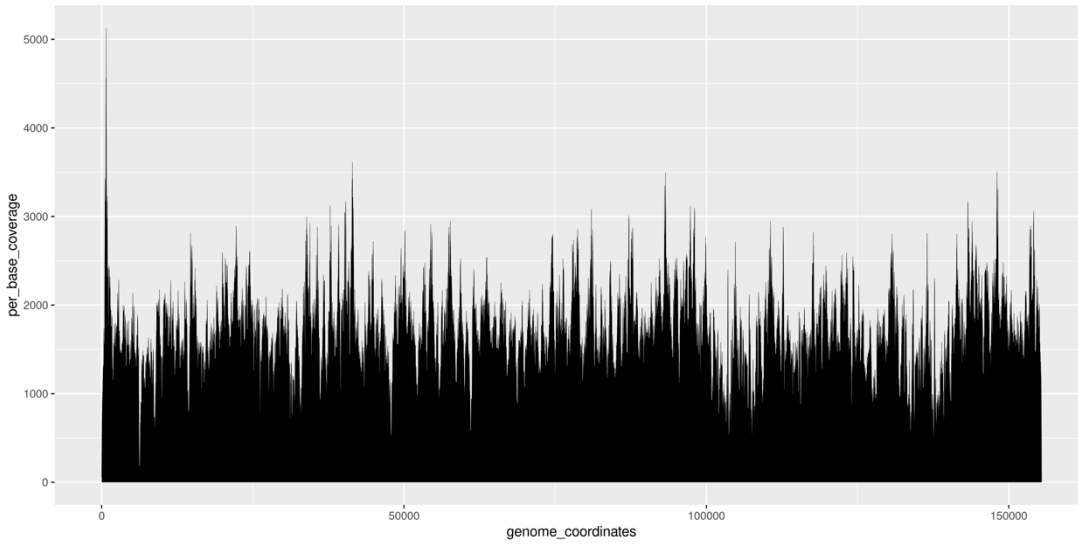

Vesuvio 2001 (average read depth/nucleotide: 1314.46)

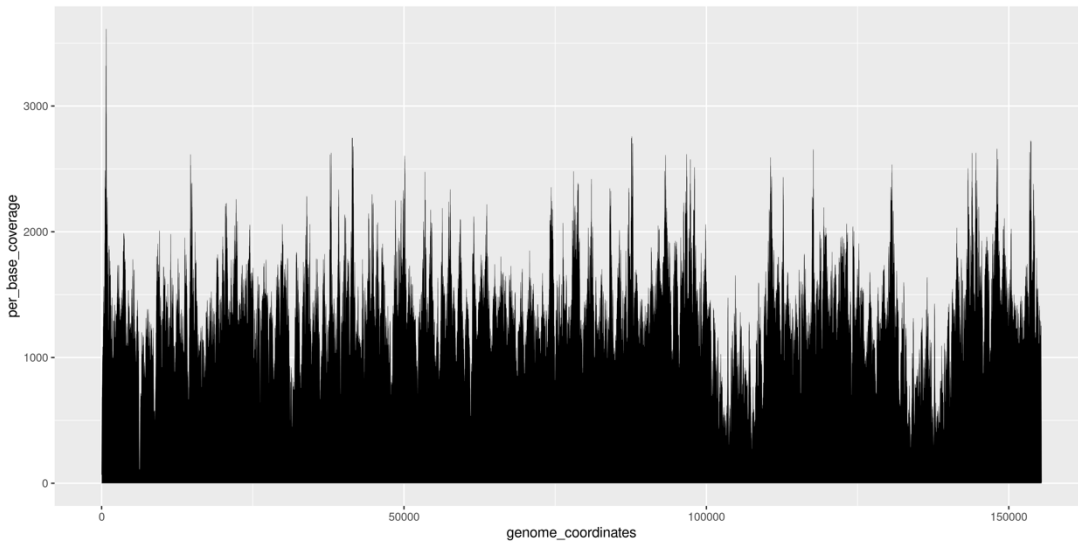

Vesuvio foglia riccia (average read depth/nucleotide: 3147.07)

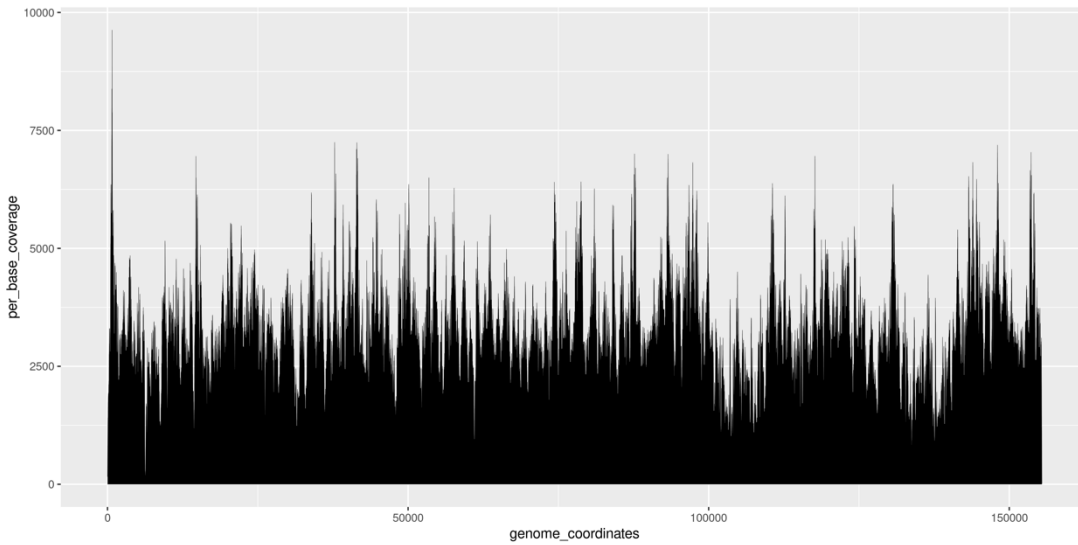

Vesuviano pizzo (average read depth/nucleotide: 600.02)



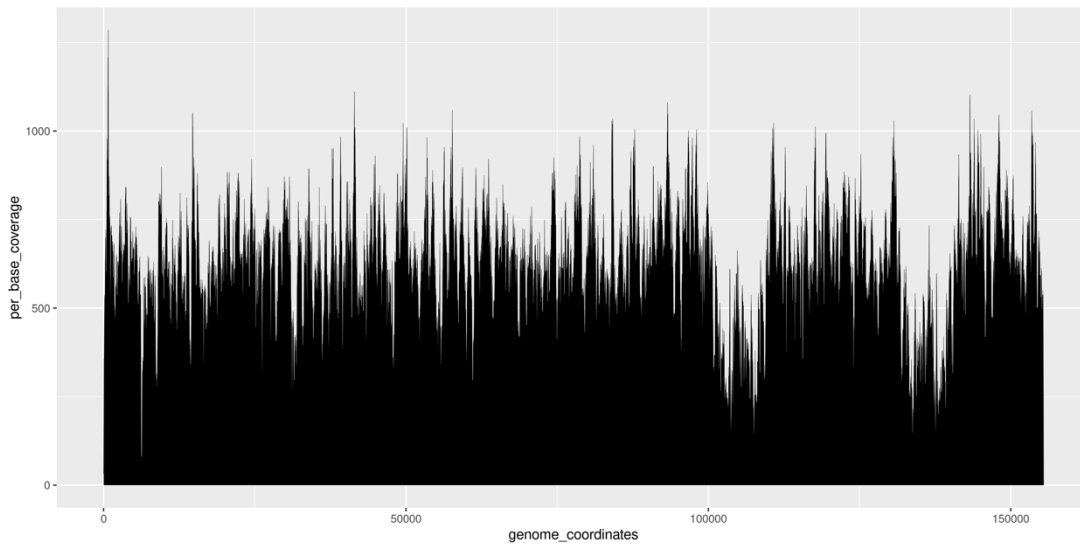

*S. neorickii* 1 (average read depth/nucleotide: 456.53)

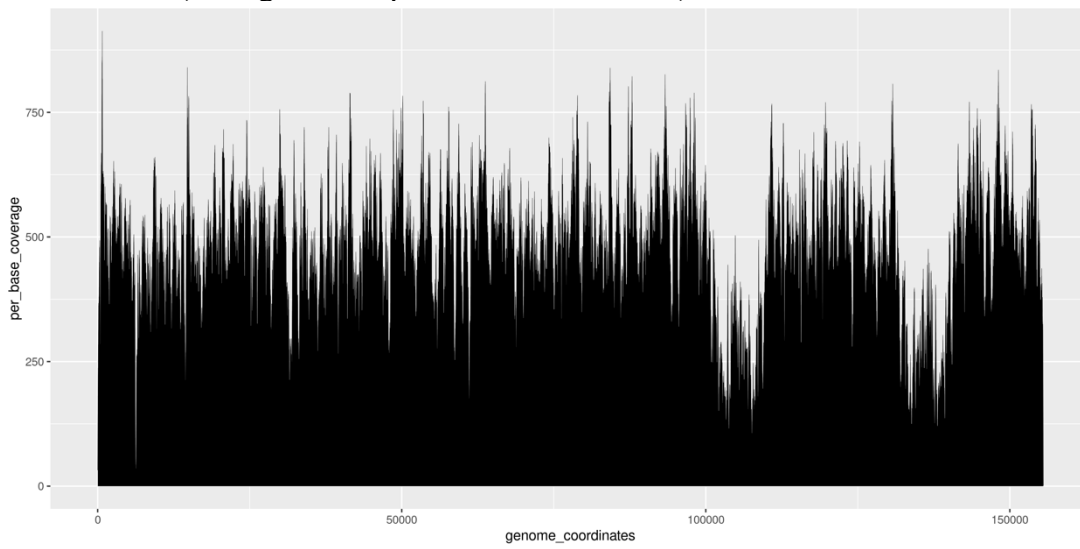

*S. pimpinellifolium* 1 (average read depth/nucleotide: 975.50)

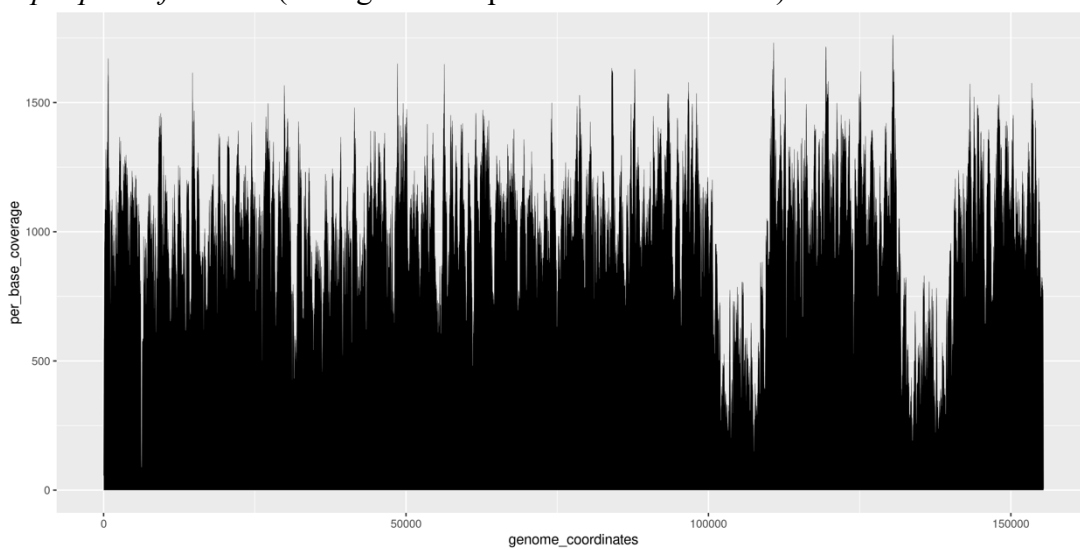

**Figure S6.** Distribution of *per*-base sequencing depth for each chloroplast genome sequenced in this work. The average coverage *per*-base is also reported.

**Table S1.** Tomato cpSSR primers developed in this study.

|     |            | LOCUS                         | Repeat      | Sequence (5'-3')                                     | Size (bp) | Fluorescent dye | Tm (°C) |
|-----|------------|-------------------------------|-------------|------------------------------------------------------|-----------|-----------------|---------|
| LSC | intron     | <i>tRNA-Lys (UUU)</i>         | (T)12       | GGTTATCAAATGATACATAGTGC<br>GGAGATGTGTGTAGAAGAAACAG   | 222       | HEX             | 55      |
| LSC | intron     | <i>tRNA-Gly (UCC)</i>         | (T)13       | CTAGAAGGATCATCTACAAAG<br>CGTTAGCTTGGGAAGGCTAGG       | 239       | FAM             | 51      |
| LSC | intergenic | <i>psbM - tRNA-Asp (GUC)</i>  | (T)16       | CGCCTTTCTAAGAGGAGTAGGA<br>CCGATGCATGTAATGGAATCG      | 314       | ATTO550         | 59      |
| LSC | intergenic | <i>atpB - rbcL</i>            | (A)13       | CATAGATTCATAGAGGAATTCCA<br>GCTTAGTCTCTGTTTGTGG       | 389       | FAM             | 55      |
| LSC | intron     | <i>clpP</i>                   | (T)17       | CCAAACCGCGATGGTATTTTCTT<br>CAATTGGATTGGTAAGATATCTATG | 288       | ATTO565         | 58      |
| LSC | intergenic | <i>rpl14 - rpl16</i>          | (A)10       | TGAGCATATCGACGATTGCT<br>CCAAAATGCCTATACGAACTC        | 262       | HEX             | 55      |
| SSC | intergenic | <i>ndhF - rpl32</i>           | (A)16-(A)19 | TCATTTCTACAGAACAGCCGAT<br>TTCGAGCTAATAGTGTCTCCTCC    | 258-261   | ATTO550         | 59      |
| SSC | intergenic | <i>rpl32 - tRNA-Leu (UAG)</i> | (A)15       | AGACCGCCATGTATATCTTGC<br>CTGAGTCTTTCCTATATTTTCTG     | 292       | ATTO565         | 58      |





**Table S3.** Tandem Repeats (TRs) in the twenty-one tomato chloroplast genomes using IPA-6 (AM087200) as reference genome. TRs copy number and location are reported. TRs were identified using the tool available at <https://tandem.bu.edu/trf/trf.basic.submit.html>.

| Sequence                 | Period Site | Copy Number |     |     |     |     |     |     |         |     |      |      |                              |                              |                       |                       |                       |                      | location |                       |                       |                     |                                |                                          |            |
|--------------------------|-------------|-------------|-----|-----|-----|-----|-----|-----|---------|-----|------|------|------------------------------|------------------------------|-----------------------|-----------------------|-----------------------|----------------------|----------|-----------------------|-----------------------|---------------------|--------------------------------|------------------------------------------|------------|
|                          |             | IPA-6       | M82 | cor | pds | pgl | pol | vpz | ves2001 | vfr | cer1 | cer2 | <i>S. pimpinellifolium 1</i> | <i>S. pimpinellifolium 2</i> | <i>S. neorickii 1</i> | <i>S. neorickii 2</i> | <i>S. habrocaites</i> | <i>S. peruvianum</i> |          | <i>S. cheesmaniae</i> | <i>S. galapagense</i> | <i>S. pennellii</i> | <i>S. chilense</i>             |                                          |            |
| GTTCAATGATATTATT         | 19          | -           | -   | -   | -   | -   | -   | -   | -       | -   | -    | -    | -                            | -                            | -                     | -                     | -                     | 2.0                  | -        | -                     | -                     | 2.0                 | LSC <i>tRNA-His (GUG)-psbA</i> | intergenic                               |            |
| ATCATGAATAAAT            | 13          | 2.0         | 2.0 | 2.0 | 2.0 | 2.0 | 2.0 | 2.0 | 2.0     | 2.0 | 2.0  | 2.0  | 2.0                          | 2.0                          | 2.0                   | 2.0                   | 2.0                   | -                    | 2.0      | 2.0                   | 2.0                   | -                   | -                              | LSC <i>tRNA-His (GUG)-psbA</i>           | intergenic |
| TAATTCCTTAATT            | 13          | 2.0         | 2.0 | 2.0 | 2.0 | 2.0 | 2.0 | 2.0 | 2.0     | 2.0 | 2.0  | 2.0  | 2.0                          | 2.0                          | 2.0                   | 2.0                   | 2.0                   | 2.0                  | 2.0      | 2.0                   | 2.0                   | 2.0                 | 2.0                            | LSC <i>tRNA-His (GUG)-psbA</i>           | intergenic |
| TAATACTATAGAT            | 13          | 2.0         | 2.0 | 2.0 | 2.0 | 2.0 | 2.0 | 2.0 | 2.0     | 2.0 | 2.0  | 2.0  | 2.0                          | 2.0                          | 2.0                   | 2.0                   | 2.0                   | 2.0                  | 2.0      | 2.0                   | 2.0                   | 2.0                 | 2.0                            | LSC <i>rps16-tRNA-Gln (UUG)</i>          | intergenic |
| ACTTACTTCTCTTCTTATA      | 22          | 2.0         | 2.0 | -   | -   | -   | -   | -   | -       | -   | 2.0  | 2.0  | -                            | -                            | -                     | -                     | -                     | 2.0                  | 2.0      | 2.0                   | 2.0                   | 2.0                 | 2.0                            | LSC <i>tRNA-Gln (UUG)-psbK</i>           | intergenic |
| GGTTAAGCTGA              | 13          | 2.0         | 2.0 | 2.0 | 2.0 | 2.0 | 2.0 | 2.0 | 2.0     | 2.0 | 2.0  | 2.0  | 2.0                          | 2.0                          | 2.0                   | 2.0                   | 2.0                   | 2.0                  | 2.0      | 2.0                   | 2.0                   | 2.0                 | 2.0                            | LSC <i>rps4</i>                          | genic      |
| ACGTAATACATATTAGAAAG     | 20          | -           | -   | -   | -   | -   | -   | -   | -       | -   | -    | -    | -                            | -                            | -                     | -                     | -                     | 2.0                  | -        | -                     | -                     | 2.0                 | 2.0                            | LSC <i>tRNA-Phe (GAA)-ndhJ</i>           | intergenic |
| AGTTAATAGTTTACCC         | 17          | -           | -   | -   | -   | -   | -   | -   | -       | -   | -    | -    | -                            | -                            | -                     | -                     | -                     | -                    | -        | -                     | -                     | 2.1                 | -                              | LSC <i>PsbE-petL</i>                     | intergenic |
| TTTTTCACTAGTGA           | 17          | -           | -   | -   | -   | -   | -   | -   | -       | -   | -    | -    | -                            | -                            | -                     | -                     | -                     | -                    | -        | -                     | -                     | -                   | 2.1                            | LSC <i>psaJ-rpl33</i>                    | intergenic |
| GAATCTAGATTGAGT          | 16          | 2.0         | 2.0 | 2.0 | 2.0 | 2.0 | 2.0 | 2.0 | 2.0     | 2.0 | 2.0  | 2.0  | 2.0                          | 2.0                          | 2.0                   | 2.0                   | 2.0                   | 2.0                  | 2.0      | 2.0                   | 2.0                   | 2.0                 | 2.0                            | LSC <i>rps18-rpl20</i>                   | intergenic |
| CATAGATATCTTA            | 13          | 2.1         | 2.1 | 2.1 | 2.1 | 2.1 | 2.1 | 2.1 | 2.1     | 2.1 | 2.1  | 2.1  | 2.1                          | 2.1                          | 2.1                   | 2.1                   | 2.1                   | 2.1                  | 2.1      | 2.1                   | 2.1                   | 2.1                 | 2.1                            | LSC <i>clpP</i>                          | intronic   |
| AGAATTAAGAATTAGAA        | 17          | 2.1         | 2.1 | 2.1 | 2.1 | 2.1 | 2.1 | 2.1 | 2.1     | 2.1 | 2.1  | 2.1  | 2.1                          | 2.1                          | 2.1                   | 2.1                   | 2.1                   | 2.1                  | 2.1      | 2.1                   | 2.1                   | 2.1                 | 2.1                            | LSC <i>rpl16-rps3</i>                    | intergenic |
| AATCAATGCAATTTAGGAGG     | 20          | 3.4         | 3.4 | 3.4 | 3.4 | 3.4 | 3.4 | 3.4 | 3.4     | 3.4 | 3.4  | 3.4  | 3.4                          | 3.4                          | 3.4                   | 3.4                   | 3.4                   | 3.4                  | 3.4      | 3.4                   | 3.4                   | 3.4                 | 3.4                            | lrb <i>tRNA-Ile-ycf2</i>                 | intergenic |
| ACTTAGTGAGTCTTCTTC       | 20          | 2.0         | 2.0 | 2.0 | 2.0 | 2.0 | 2.0 | 2.0 | 2.0     | 2.0 | 2.0  | 2.0  | 2.0                          | 2.0                          | 2.0                   | 2.0                   | 2.0                   | 2.0                  | 2.0      | 2.0                   | 2.0                   | 2.0                 | 2.0                            | lrb <i>rps12-tRNA-Val (GAC)</i>          | intergenic |
| GTCATTAATATCTTTG         | 16          | -           | -   | -   | -   | -   | -   | -   | -       | -   | -    | -    | -                            | -                            | -                     | -                     | -                     | 2.0                  | -        | -                     | -                     | -                   | 2.0                            | lrb <i>tRNA-Arg (ACG)-tRNA-Asn (GUU)</i> | intergenic |
| AGAAGAAGTATATAAAA        | 18          | -           | -   | -   | -   | -   | -   | -   | -       | -   | -    | -    | -                            | -                            | -                     | -                     | -                     | -                    | -        | -                     | -                     | -                   | -                              | SSC <i>rpl32-tRNA-Leu (UAG)</i>          | intergenic |
| TTGTTTTAGATCCGAACCTGCTTC | 26          | -           | -   | -   | -   | -   | -   | -   | -       | -   | -    | -    | -                            | -                            | -                     | -                     | -                     | -                    | 2.0      | 2.0                   | -                     | -                   | -                              | SSC <i>ndhG-ndhI</i>                     | intergenic |
